# Supplementary material for: The bacterial quorum sensing signal 2’-aminoacetophenone rewires immune cell bioenergetics through the Ppargc1a/Esrra axis to mediate tolerance to infection
Source: eLife. 2024 Sep 13;13:RP97568. doi: 10.7554/eLife.97568 (PMC11398867; doi:10.7554/eLife.97568)
Supplement: Figure 1—figure supplement 1—source data 1. [file elife-97568-fig1-figsupp1-data1.xlsx]

## Sheet: A
c1	1	c6	6	c24	24	c48	48		c6	6
99.32	450.7	111.687	301.7	140.248	218.59	216.21	215.23	0	209.3	209.07
101.9	448.2	98.2738	305.3	154.93	216.2	211.587	201.1	0	205.2	207.25
99.54	447.2	91.4717	300.3	153.547	215.2	215.622	201.1	0	207.2	207.45

## Sheet: B
c1	1	c6	6	c24	24	c48	48		c6	6
4.46	11.71	8.29566	29.17	13.1214	21.59	17.9471	18.63	0	19.23	19.07
4.36	11.69	5.55115	29.67	11.9929	22.19	18.4347	18.53	0	19.43	18.97
4.56	11.62	6.08249	27.27	11.9872	23.99	17.8919	18.13	0	19.13	19.37

## Sheet: C
c	1	6	24		c	1	6	24
10	50.7	31.7	21.59	0	20.63	20.3	21.07	20.5
11.9	48.2	29.3	21.2	0	20.1	20.2	21.5	17.5
19.54	47.2	30.3	21.2	0	20.1	20.2	18.5	19.5

## Sheet: D
c	1	6	24		c	1	6	24
2.2	6.2	3.9	3.3	0	3.1	3.2	3.14	2.35
2.1	5.9	4.05	2.95	0	3.05	3.15	3.04	2.56
1.9	6.7	4.1	2.75	0	3.65	3.12	2.94	3.2

## Sheet: E
c	1	6	24		c	1	6	24
0.6	1.23	1.46	1.46	0	1.41	1.49	1.69	1.45
0.659	1.29	1.41	1.36	0	1.31	1.31	1.67	1.25
0.5	1.27	1.44	1.46	0	1.39	1.41	1.52	1.05

## Sheet: F
c	1	6	24		c	1	6	24
0.098	0.61	0.78	0.315	0	0.232	0.254	0.259	0.215
0.099	0.68	0.798	0.335	0	0.215	0.2054	0.251	0.201
0.097	0.649	0.68	0.275	0	0.231	0.254	0.242	0.214
