# Supplementary material for: The bacterial quorum sensing signal 2’-aminoacetophenone rewires immune cell bioenergetics through the Ppargc1a/Esrra axis to mediate tolerance to infection
Source: eLife. 2024 Sep 13;13:RP97568. doi: 10.7554/eLife.97568 (PMC11398867; doi:10.7554/eLife.97568)
Supplement: Figure 1—figure supplement 2—source data 1. [file elife-97568-fig1-figsupp2-data1.xlsx]

## Sheet: Tabelle1
c	6	-		c	6	6
81.9219	180.015	184.211		92.9691	130.458	128.508
75.7613	119.043	156.807		83.4281	60.0035	107.832
84.7272	160.588	190.811		97.8309	91.409	138.082
78.5085	143.805	205.974		102.025	98.9633	132.131
