# Supplementary material for: The bacterial quorum sensing signal 2’-aminoacetophenone rewires immune cell bioenergetics through the Ppargc1a/Esrra axis to mediate tolerance to infection
Source: eLife. 2024 Sep 13;13:RP97568. doi: 10.7554/eLife.97568 (PMC11398867; doi:10.7554/eLife.97568)
Supplement: Figure 1—figure supplement 3—source data 1. [file elife-97568-fig1-figsupp3-data1.xlsx]

## Sheet: Tabelle1
c	1	24	c	1
16.32	22.07	24.75	17.63	28.46
17.42	23.67	18.89	10.17	14.97
17.54	19.17	14.61	13.74	12.45
21.39	23.38	16.87	19.21	12.98
24.82	23.42	19.25	24.2	14.11
22	21.48	10.66	15.9	12.29
