# Supplementary material for: The bacterial quorum sensing signal 2’-aminoacetophenone rewires immune cell bioenergetics through the Ppargc1a/Esrra axis to mediate tolerance to infection
Source: eLife. 2024 Sep 13;13:RP97568. doi: 10.7554/eLife.97568 (PMC11398867; doi:10.7554/eLife.97568)
Supplement: Figure 1—source data 1. [file elife-97568-fig1-data1.xlsx]

## Sheet: Tabelle1
1st exposure						2nd exposure
c	1h	c	6h	c	48h	c	1	c	6
78.8416	192.072	78.8416	168.016	78.8416	91.2666	79.163	112.481	91.1261	48.2883
78.2443	179.37	78.2443	119.043	78.2443	80.8781	95.1362	76.7037	47.5073	31.5712
76.6179	252.845	76.6179	148.08	76.6179	100.281	85.6919	110.034	74.2419	31.2841
75.7152	232.424	75.7152	142.685	75.7152	99.5254	77.3199	98.6195	32.1354	48.6454
