# Supplementary material for: The bacterial quorum sensing signal 2’-aminoacetophenone rewires immune cell bioenergetics through the Ppargc1a/Esrra axis to mediate tolerance to infection
Source: eLife. 2024 Sep 13;13:RP97568. doi: 10.7554/eLife.97568 (PMC11398867; doi:10.7554/eLife.97568)
Supplement: Figure 1—source data 2. [file elife-97568-fig1-data2.xlsx]

## Sheet: Tabelle1
1st exposure						2nd exposure
c	1h	c	6h	c	48h	c	1h	c	6h
22.405	58.5385	22.405	39.778	22.405	37.1259	37.1259	25.8412	20.7675	26.2595
29.3584	74.7781	29.3584	45.6256	29.3584	32.2058	32.2058	30.0854	24.2766	29.3241
32.7322	69.1216	32.7322	44.5261	32.7322	33.4948	33.4948	38.6078	23.8145	16.8571
27.2804	63.0853	27.2804	47.1309	27.2804	28.0349	28.0349	35.73	22.9993	19.0821
