# Supplementary material for: The bacterial quorum sensing signal 2’-aminoacetophenone rewires immune cell bioenergetics through the Ppargc1a/Esrra axis to mediate tolerance to infection
Source: eLife. 2024 Sep 13;13:RP97568. doi: 10.7554/eLife.97568 (PMC11398867; doi:10.7554/eLife.97568)
Supplement: Figure 1—source data 3. [file elife-97568-fig1-data3.xlsx]

## Sheet: Tabelle1
Time (minutes)	Control						Exposure (1h)						Re-exposure 1 hr						Re-exposure Control						Exposure 24 hr
1.30847	30.205	33.8104	36.8473	37.4174	41.5974	31.2453	45.3342	53.4201	51.2428	48.9497	60.1072	61.9309	25.0685	27.603	25.0194	21.2489	24.6812	27.4387	21.0842	28.6628	28.1879	28.0825	35.2389	29.9997	19.5193	31.0769	25.9623	30.4391	34.2464	30.6934
7.75629	29.1724	33.3504	34.9478	37.311	40.9633	30.562	43.1766	50.5536	48.9237	47.0502	58.1136	60.403	24.5078	27.1889	22.8942	21.3075	23.1678	27.3	19.397	28.1693	27.1498	25.6059	33.6715	29.7399	18.2961	30.2607	25.1234	29.3913	33.9545	31.1057
14.1973	29.4366	34.0555	34.5988	37.6015	41.469	29.9562	43.5535	50.8406	48.2267	47.4384	57.8283	60.442	24.8654	28.6472	24.3429	21.8481	23.5878	27.5188	19.9133	28.1549	27.2256	25.0783	34.9126	30.4684	18.1157	30.9334	25.5023	30.4896	34.2195	30.9495
20.7126	28.5985	33.1457	33.2124	36.5276	37.7264	28.6872	41.8139	49.1103	43.4877	46.1068	55.7225	59.1202	23.8204	27.6443	23.1728	19.9508	23.0003	26.7321	18.9195	26.4157	26.4932	24.2704	34.553	29.3239	17.7163	30.7095	24.6613	30.054	32.5428	29.9877
27.1569	28.3252	33.5882	32.9174	37.0036	39.9028	28.6488	42.8098	50.2698	45.3151	45.965	56.0767	60.2556	24.2511	28.1156	24.3961	19.7904	23.1059	27.4566	18.0453	27.5163	26.029	22.9942	34.2868	29.723	17.7972	31.0529	25.6731	30.8024	33.4583	31.3157
33.6021	28.6072	32.6903	32.6917	37.4286	40.9419	29.3537	41.8541	50.0682	44.6638	45.9868	56.1586	59.9449	24.1831	28.1616	24.2647	20.2361	22.7497	26.4973	18.3886	26.7128	25.6705	22.9611	35.2955	29.7813	18.3852	31.2662	25.9999	30.0782	33.9176	31.4228
40.1195	16.2172	18.81	18.7677	20.6626	21.7391	15.078	22.1387	27.5632	26.172	28.4564	28.6479	30.4445	14.4123	16.4491	14.077	12.4917	13.5167	16.3051	10.0962	15.1935	16.229	13.0332	22.2381	18.6229	11.3748	17.0883	16.0057	17.8863	20.4684	16.509
46.5671	15.1451	18.9705	17.2645	19.5143	20.0194	14.4925	21.8836	26.9256	25.2101	26.9936	28.3863	29.6166	14.0775	16.5386	13.0414	11.9779	14.0926	15.5474	10.279	15.4536	16.2701	12.005	21.1582	18.1961	10.4886	16.3827	15.3276	18.0978	19.7177	16.2525
53.0163	14.5609	17.6807	17.0023	19.0718	19.4263	14.6584	20.5893	26.0232	23.7045	26.8317	28.076	29.2245	13.1052	16.2792	13.8276	12.6063	13.5767	15.3242	11.2598	16.1534	15.8968	11.8471	20.8306	18.8253	10.6405	15.7586	15.0587	17.5414	19.4376	15.7438
59.5366	36.2279	46.4504	49.275	57.1416	61.9676	41.1935	58.1636	71.7737	66.647	58.5909	81.1067	84.4692	30.14	38.1247	31.5767	31.1037	27.3502	36.2092	23.9549	38.5011	32.0366	34.0479	46.7281	37.0192	22.5841	45.2278	33.4839	37.1613	47.284	39.4365
65.985	38.9503	49.1045	52.9857	61.2396	65.3341	44.5994	61.2603	73.7982	69.2485	61.6783	83.5509	90.5032	33.4943	43.021	36.1683	28.625	31.5243	40.6912	24.3227	42.0332	35.7347	37.7564	50.2962	40.9701	25.5691	49.5138	37.3408	41.7453	52.0654	44.1602
72.4347	43.8171	54.0831	57.5131	66.2043	70.5624	51.3539	65.5278	76.852	72.0708	63.7257	87.3336	95.7583	36.4714	47.04	39.2388	32.6875	35.7342	43.5877	28.5563	45.6011	39.4126	42.1671	54.5501	45.6861	29.0457	56.0166	40.6124	46.9477	58.1202	49.0547
78.9517	13.9076	19.1624	16.265	21.0695	30.5251	13.9818	19.0797	21.4373	30.8175	24.4404	23.8671	37.5572	12.7881	14.1082	12.7703	8.74335	12.2037	15.4002	11.1302	14.3938	15.4897	12.5986	21.553	19.6555	10.4689	15.4097	15.5282	17.9749	18.5972	18.0056
85.4028	14.2482	17.074	15.556	19.0869	21.8419	14.3055	17.2883	21.1433	21.7826	23.4072	22.7225	27.7185	11.691	14.3767	11.6747	9.23515	12.7453	14.7742	9.55888	14.7585	15.0647	9.54357	19.7625	17.6796	10.634	14.0168	13.5238	16.9924	18.8649	15.8433
91.8566	13.961	16.9243	15.3213	17.7846	18.3936	12.0355	17.0852	21.0756	19.0112	22.8636	21.8925	25.6384	11.8096	13.5681	11.9688	9.06557	12.2515	13.4214	9.7114	14.0043	13.676	10.5946	19.752	17.8005	10.0308	14.1913	14.0479	16.3217	17.9998	14.9576
