# Supplementary material for: The bacterial quorum sensing signal 2’-aminoacetophenone rewires immune cell bioenergetics through the Ppargc1a/Esrra axis to mediate tolerance to infection
Source: eLife. 2024 Sep 13;13:RP97568. doi: 10.7554/eLife.97568 (PMC11398867; doi:10.7554/eLife.97568)
Supplement: Figure 2—figure supplement 1—source data 1. [file elife-97568-fig2-figsupp1-data1.xlsx]

## Sheet: Tabelle1
	1	24		1
16.7	29.76	8.08	10.2	9.64
18.28	26.47	16.74	14.15	10.24
17.13	29.22	11.45	13.55	15.08
22.48	24.57	14.17	14.48	8.32
19.82	35.94	16.22	15.16	11.34
23.08	34.8	15.99	12.67	13.06
