# Supplementary material for: The bacterial quorum sensing signal 2’-aminoacetophenone rewires immune cell bioenergetics through the Ppargc1a/Esrra axis to mediate tolerance to infection
Source: eLife. 2024 Sep 13;13:RP97568. doi: 10.7554/eLife.97568 (PMC11398867; doi:10.7554/eLife.97568)
Supplement: Figure 2—figure supplement 1—source data 2. [file elife-97568-fig2-figsupp1-data2.xlsx]

## Sheet: Tabelle1
	1	24		1
28.48	55.78	19.01	18.84	25.18
29.86	46.23	41.83	31.6	20.7
32.27	53.06	26.56	25.74	16.21
28.58	48.44	30.63	31.57	23.62
32.72	65.44	40.12	34.8	23.48
39.32	70.12	34.1	27.89	26.22
