# Supplementary material for: The bacterial quorum sensing signal 2’-aminoacetophenone rewires immune cell bioenergetics through the Ppargc1a/Esrra axis to mediate tolerance to infection
Source: eLife. 2024 Sep 13;13:RP97568. doi: 10.7554/eLife.97568 (PMC11398867; doi:10.7554/eLife.97568)
Supplement: Figure 2—source data 1. [file elife-97568-fig2-data1.xlsx]

## Sheet: Cytosolic
C	1		C3	3		C24	24		C48	48		C1	1
2.5	4.3	0	2.96143	5.67	0	2.83467	4.35	0	3.03349	4.15	0	4.14	4.93
2.7	4.2	0	2.66969	5.27	0	2.87912	4.15	0	3.07331	4.65	0	4.17	4.43
2.9	4.21	0	2.91927	5.67	0	3.76505	4.25	0	3.73029	4.13	0	4.21	4.13
2.19149	3.13674	0	2.91372	5.33924	0	3.03349	4.65	0	5.56323	4.10245	0	4.22857	4.54671
2.54361	3.7326	0	3.08402	5.95052	0	2.19926	4.13	0	3.86205	4.10403	0	2.57784	4.46575

## Sheet: Mitochondrial
c	1		c	3		C24	24		c	48		c	1
0.45	1.19	0	0.44227	1.35	0	0.446135	0.608	0	0.45	0.29	0	0.29	0.251
0.51	1.59	0	0.460964	1.39	0	0.485482	0.635	0	0.51	0.21	0	0.21	0.271
0.52	1.29	0	0.430267	1.37	0	0.475134	0.695	0	0.52	0.29	0	0.29	0.221
0.457047	0.907118	0	0.460892	1.54107	0	0.45897	0.685	0	0.457047	0.213524	0	0.213524	0.280997
0.509807	0.868683	0	0.732234	1.79877	0	0.621021	0.770534	0	0.509807	0.245042	0	0.245042	0.216192
