# Supplementary material for: The bacterial quorum sensing signal 2’-aminoacetophenone rewires immune cell bioenergetics through the Ppargc1a/Esrra axis to mediate tolerance to infection
Source: eLife. 2024 Sep 13;13:RP97568. doi: 10.7554/eLife.97568 (PMC11398867; doi:10.7554/eLife.97568)
Supplement: Figure 3—source data 1. [file elife-97568-fig3-data1.xlsx]

## Sheet: Tabelle1
PBS	2-AA	PBS	2-AA
0.431499	0.039302	1.06875	0.82963
0.323705	0.087745	0.90566	0.703448
0.31984	0.028945	1.01744	0.70625
