# Supplementary material for: The bacterial quorum sensing signal 2’-aminoacetophenone rewires immune cell bioenergetics through the Ppargc1a/Esrra axis to mediate tolerance to infection
Source: eLife. 2024 Sep 13;13:RP97568. doi: 10.7554/eLife.97568 (PMC11398867; doi:10.7554/eLife.97568)
Supplement: Figure 3—source data 2. [file elife-97568-fig3-data2.xlsx]

## Sheet: Tabelle1
PBS-ERRα	2-AA-ERRα	PBS IgG	2-AA-IgG
3.53625	1.73453	0.595571	2.6351
5.7183	1.33039	0.741961	1.3814
3.20495	1.49378	1.66248	2.25525
