# Supplementary material for: The bacterial quorum sensing signal 2’-aminoacetophenone rewires immune cell bioenergetics through the Ppargc1a/Esrra axis to mediate tolerance to infection
Source: eLife. 2024 Sep 13;13:RP97568. doi: 10.7554/eLife.97568 (PMC11398867; doi:10.7554/eLife.97568)
Supplement: Figure 4—source data 2. [file elife-97568-fig4-data2.xlsx]

## Sheet: Tabelle1
PA14	mvfR	mvfR+2-AA	PA14+ATP	mvfR+ATP	mvfR+2AA+ATP	PA14+UK5099	mvfR+UK5099	mvfR+Uk5099+ATP
1.16065	1.9338	1.36724	2.47932	2.03862	1.06525	0.331913	1.29332	2.72292
0.910741	1.87551	1.3269	1.44023	2.03989	0.897216	0.311192	1.00743	1.36721
0.792902	1.0797	1.04381	2.40129	2.51975	0.957041	1.19907	0.960559	1.54899
0.896544	2.4477	1.41499	1.60293	2.81416	1.52732	0.916214	0.956763	1.53733
1.23264	2.35738	1.28405	1.80192	2.6816	1.36061	0.519403	1.08171	1.70575
1.07842	2.64753	1.6805	1.70084	1.8564	1.22226	0.431636	0.767756	1.53881
