# Supplementary material for: The bacterial quorum sensing signal 2’-aminoacetophenone rewires immune cell bioenergetics through the Ppargc1a/Esrra axis to mediate tolerance to infection
Source: eLife. 2024 Sep 13;13:RP97568. doi: 10.7554/eLife.97568 (PMC11398867; doi:10.7554/eLife.97568)
Supplement: Figure 4—source data 3. [file elife-97568-fig4-data3.xlsx]

## Sheet: Tabelle1
PA14	mvfR	mvfR+2-AA	PA14+ATP	mvfR+ATP
1.03422	3.48926	2.05271	2,052147*	4.63541
1.15278	7.89229	0.192422	2,21686*	4.3277
0.786791	1.47714	2.79508	3.7475	4.34208
0.877245	3.56431	1.91846	3.09679	4.84942
1.10949	7.63133	2.00821	5.63445	9.24198
1.03948	8.97432	2.46542	5.59088	6.39796
