# Supplementary material for: The bacterial quorum sensing signal 2’-aminoacetophenone rewires immune cell bioenergetics through the Ppargc1a/Esrra axis to mediate tolerance to infection
Source: eLife. 2024 Sep 13;13:RP97568. doi: 10.7554/eLife.97568 (PMC11398867; doi:10.7554/eLife.97568)
Supplement: Figure 4—source data 4. [file elife-97568-fig4-data4.xlsx]

## Sheet: Tabelle1
PA14	mvfR	mvfR+2-AA	PA14+ATP	mvfR+ATP	mvfR+2AA+ATP	PA14+UK5099	mvfR+UK5099	mvfR+Uk5099+ATP
93.1034	7.75862	69.8276	5.17241	7.75862	38.7931	69.8276	77.5862	38.7931
93.1034	13.9655	69.8276	19.3966	7.75862	31.0345	77.5862	93.1034	46.5517
100.862	12.931	62.069	11.6379	10.3448	31.0345	103.448	85.3448	54.3103
77.5862	18.1034	77.5862	7.75862	12.931	38.7931	116.379	77.5862	62.069
93.1034	15.5172	62.069	5.17241	5.17241	31.0345	129.31	93.1034	46.5517
98.2759	15.5172	54.3103	5.17241	7.75862	46.5517	103.448	77.5862	46.5517
85.3448	15.5172	62.069	15.5172	7.75862	46.5517	69.8276	77.5862	38.7931
116.379	7.75862	62.069	23.2759	5.17241	31.0345	77.5862	69.8276	31.0345
116.379	11.6379	54.3103	31.0345	6.2069	31.0345	116.379	69.8276	38.7931
93.1034	13.9655	62.069	11.6379	2.58621	23.2759	139.655	77.5862	46.5517
116.379	6.98276	77.5862	25.8621	11.6379	38.7931	93.1034	77.5862	37.5
116.379	11.6379	77.5862	11.6379	2.58621	45.2586	116.379	62.069	38.7931
