# Supplementary material for: The bacterial quorum sensing signal 2’-aminoacetophenone rewires immune cell bioenergetics through the Ppargc1a/Esrra axis to mediate tolerance to infection
Source: eLife. 2024 Sep 13;13:RP97568. doi: 10.7554/eLife.97568 (PMC11398867; doi:10.7554/eLife.97568)
Supplement: Figure 5—figure supplement 1—source data 1. [file elife-97568-fig5-figsupp1-data1.xlsx]

## Sheet: ATP
Naïve	Sham	Tol+PA14	Tol	Tol+ΔmvfR
2.82326	3.83402	0.570627	0.720771	0.866383
2.47759	4.15544	0.503616	0.375543	0.113172
2.85889	3.19636	0.659402	0.51444	0.722079
2.35	3.28983	0.62639	0.594738	0.753323

## Sheet: acetyl-CoA
Naïve	Sham	Tol+PA14	Tol	Tol+ΔmvfR
309694	474715	76680.6	115114	166429
372665	576288	88400.8	114275	141876
369680	491503	96940.4	127270	216337
352701	487583	79730	98532.4	106552

## Sheet: CFU
Naïve	Sham	Tol+PA14	Tol	Tol+ΔmvfR
0	0	7.65782	0	7.00027
0	0	7.84315	0	7.62981
0	0	7.90483	0	7.25585
0	0	8.1132	0	6.74352
