# Supplementary material for: The bacterial quorum sensing signal 2’-aminoacetophenone rewires immune cell bioenergetics through the Ppargc1a/Esrra axis to mediate tolerance to infection
Source: eLife. 2024 Sep 13;13:RP97568. doi: 10.7554/eLife.97568 (PMC11398867; doi:10.7554/eLife.97568)
Supplement: Figure 5—source data 1. [file elife-97568-fig5-data1.xlsx]

## Sheet: Day1
Naïve	Sham	PA14	2-AA	ΔmvfR	ΔmvfR+2AA
3.31449	3.41974	0.63764	0.796504	2.75128	0.527366
2.98255	3.75065	0.666122	1.66031	3.91481	0.601728
3.27559	5.13531	0.404629	0.963165	4.59577	0.395749
3.33784	2.69039	0.646517	0.990574	4.35972	0.086384

## Sheet: Day5
Naïve	Sham	PA14	2-AA	ΔmvfR	ΔmvfR+2AA
3.20935	2.66897	0.709674	0.553591	2.05531	0.309191
2.07472	2.82376	0.577309	0.514585	2.24086	0.649158
1.8844	2.71412	0.71961	0.355815	1.99649	0.434766
2.09772	2.86185	0.760164	0.43437	2.02229	0.286223

## Sheet: Day10
Naïve	Sham	PA14	2-AA	ΔmvfR	ΔmvfR+2AA
2.82326	2.8329	1.08429	0.138931	4.28711	0.719119
2.47759	3.83402	0.989698	0.720771	2.90408	0.578264
2.85889	4.15544	0.613791	0.375543	2.83545	0.552399
3.54216	3.19636	0.950275	0.51444	3.7605	0.730055
2.35	3.28983	0.828866	0.594738	3.60656	0.626435
