# Supplementary material for: The bacterial quorum sensing signal 2’-aminoacetophenone rewires immune cell bioenergetics through the Ppargc1a/Esrra axis to mediate tolerance to infection
Source: eLife. 2024 Sep 13;13:RP97568. doi: 10.7554/eLife.97568 (PMC11398867; doi:10.7554/eLife.97568)
Supplement: Figure 5—source data 2. [file elife-97568-fig5-data2.xlsx]

## Sheet: Day1
Naïve	Sham	PA14	2-AA	ΔmvfR	ΔmvfR+2AA
478133	488160	343661	154847	404733	105900
426452	445608	273261	198270	522976	108271
384713	622940	256400	147085	725028	161702
439366	491602	206939	148266	632160	91243

## Sheet: Day5
Naïve	Sham	PA14	2-AA	ΔmvfR	ΔmvfR+2AA
455064	497657	194034	162636	530072	153947
334511	519230	208004	120757	576515	91034.3
346264	454653	185712	169473	602500	225027
347784	496089	173351	96070	514947	69743.8
305001	608301	172240		516474	126459

## Sheet: Day10
Naïve	Sham	PA14	2-AA	ΔmvfR	ΔmvfR+2AA
440317	438137	182485	115114	465686	87744.9
309694	474715	176828	114275	564648	132950
372665	576288	163036	127270	616471	130787
369680	491503	166105	98532.4	625326	184101
352701	487583	193583		477976	204870
