# Supplementary material for: The bacterial quorum sensing signal 2’-aminoacetophenone rewires immune cell bioenergetics through the Ppargc1a/Esrra axis to mediate tolerance to infection
Source: eLife. 2024 Sep 13;13:RP97568. doi: 10.7554/eLife.97568 (PMC11398867; doi:10.7554/eLife.97568)
Supplement: Figure 5—source data 3. [file elife-97568-fig5-data3.xlsx]

## Sheet: Day1
Naïve	Sham	PA14	2-AA	ΔmvfR	ΔmvfR+2AA
0	0	7.25142	0	7.9591	7.72852
0	0	8.17965	0	7.02891	8.21255
0	0	7.96805	0	7.82006	7.16569
0	0	7.8199	0	7.79732	7.85313
0	0	7.98947	0	7.19601	8.1673

## Sheet: Day5
Naïve	Sham	PA14	2-AA	ΔmvfR	ΔmvfR+2AA
0	0	6.82884	0	5.4974	7.02555
0	0	6.55085	0	5.29954	7.97231
0	0	6.2522	0	4.98616	7.13856
0	0	6.67934	0	5.25743	6.60293
0	0	6.0336	0	5.74978	7.53494

## Sheet: Day10
Naïve	Sham	PA14	2-AA	ΔmvfR	ΔmvfR+2AA
0	0	7.03547	0	5.59295	6.79609
0	0	6.89848	0	4.25181	7.80967
0	0	6.89877	0	4.48461	7.00412
0	0	7.31813	0	4.78237	7.43474
0	0	7.10721	0	5.68728	7.11577
